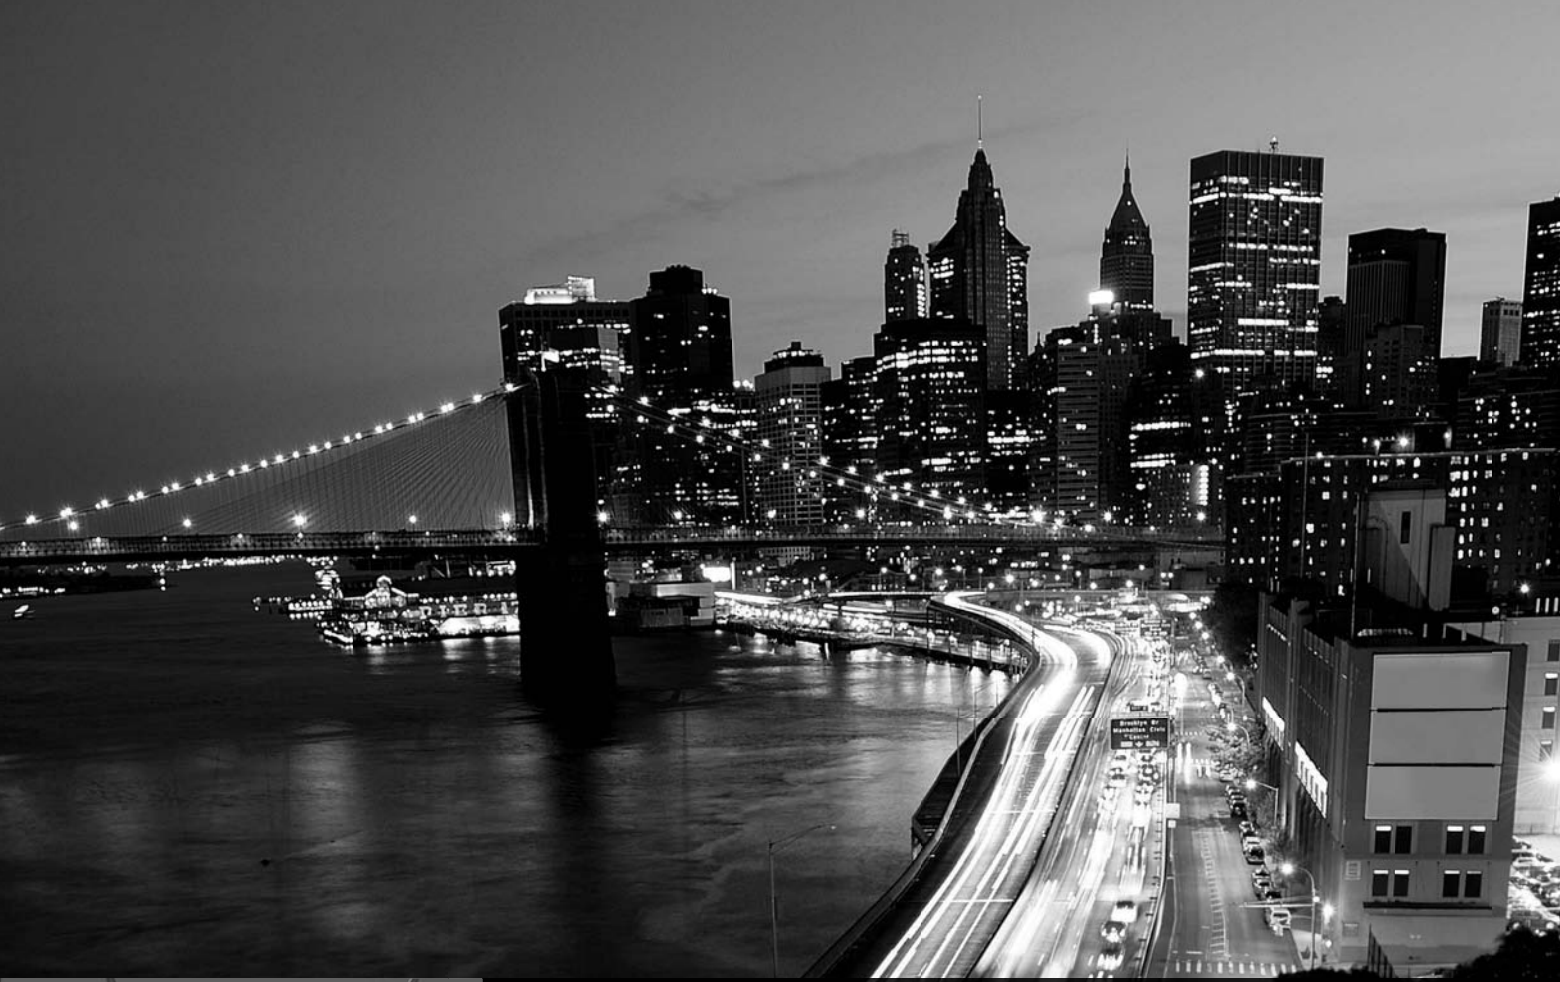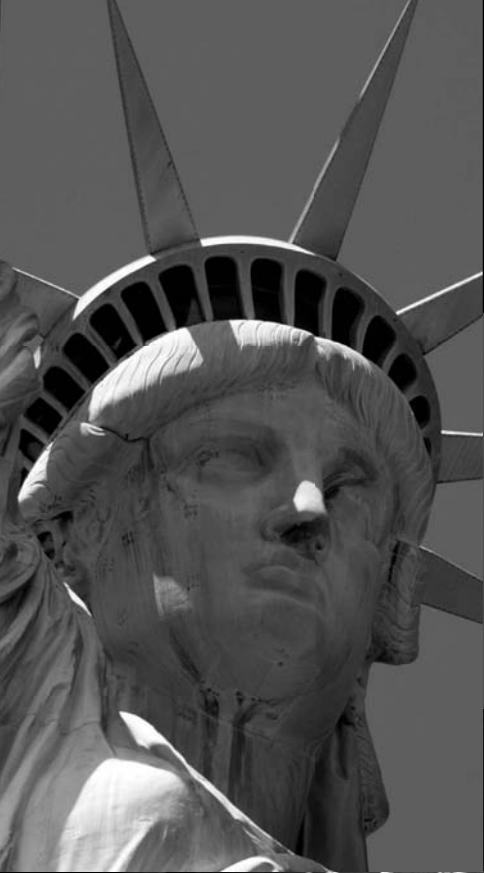

# When Good Care Confronts Red Tape:

Navigating the System for Our Patients and Our Practice

**67<sup>TH</sup>** INSTITUTE ON  
*PSYCHIATRIC SERVICES*

**NEW YORK CITY | OCTOBER 8–11, 2015**  
**SHERATON NEW YORK HOTEL & TOWERS**

APA's Leading Educational Conference on Public, Community and Clinical Psychiatry

For more info, visit  
[psych.org/ips](http://psych.org/ips)

American  
Psychiatric  
Association

# Integrated Care Systems

*Psychiatric News* features highly informative content on the emerging practice model of integrated care.

Learn about:

- Predominant models of integrated care and the role psychiatrists play
- Working in integrated care settings
- Payment and delivery models
- APA resources on integrated care and delivery systems initiatives

For new psychiatrists entering the field, understanding the key role of systems of care has never been more important. Research published each month in *Psychiatric Services* will help residents play a vital role in the systems of care where they work, which is why the American Psychiatric Association provides psychiatric residents who are APA Members-in-Training full-text online access to *Psychiatric Services* content as a benefit.

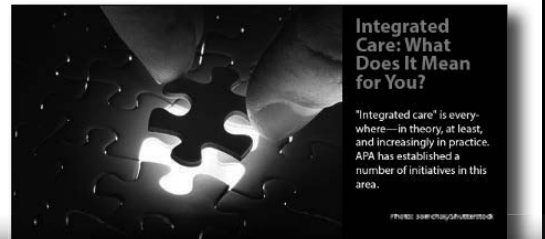

The screenshot shows the full webpage layout for the article. At the top, there is a navigation bar with links for 'psychiatryonline', 'DSM Library', 'Books', 'Journals', 'Topics', 'APA Guidelines', 'CME & Self-Assessment', 'News', 'For Patients', 'My POL', and a search box. Below this is the main header for 'PSYCHIATRIC NEWS' with the American Psychiatric Association logo and a search bar. A secondary navigation bar includes categories like 'Clinical & Research', 'Professional', 'Government & Legal', 'In the Community', 'APA & Meetings', and 'From the Press'. The main content area features the article title 'Integrated Care: What Does It Mean for You?' with a sub-header 'Professional News' and a date 'September 20, 2013'. The article text begins with: 'Integrated care' is everywhere—in theory, at least, and increasingly in practice. The concept is a feature of the delivery-system improvements in the new health care reform law, and policymakers and many clinicians have converged on the idea that general medical and behavioral health services should be brought together in a patient-centered manner. Today, a small but dedicated and growing cadre of psychiatrists is advancing the cause of integrated care and the participation of psychiatrists in collaborative-care models. The article continues to discuss the role of the APA and various initiatives in this area, mentioning figures like Lori Raney, M.D., and Howard Goldman, M.D. On the right side of the page, there are several advertisements, including one for a 'Clinical Guide to DEPRESSION and BIPOLAR DISORDER' and another for 'A daily "pearl" is just Clinical wisdom gleaned from The American Journal of Psychiatry'. At the bottom right, there is a 'Related Articles' section with links to 'Integrated Care FAQ Answers' and 'Why the IPS is a Can't-Miss Meeting'.

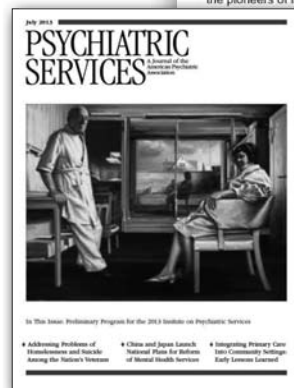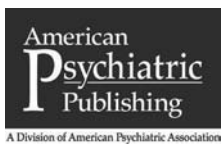

psychnews.psychiatryonline.org  
 www.appi.org • 1-800-368-5777 • Email: appi@psych.org

Priority Code AH1329

# American Neuropsychiatric Association

The American Neuropsychiatric Association (ANPA), established in 1988, is an organization of professionals in neuropsychiatry, behavioral neurology, neuropsychology and the clinical neurosciences. Our mission is to improve the lives of people with disorders at the interface of psychiatry and neurology.

One strength of our organization is our diverse membership, which is comprised of professionals in all areas of neuroscience who share clinical and/or academic interests in neuropsychiatry. The interdisciplinary makeup of the membership encourages collaboration among educators, clinicians, researchers, students and trainees during research presentations, symposia, workshops, and continuing education courses. *The Journal of Neuropsychiatry and Clinical Neurosciences (JNCN)* is the official publication of the organization, and a subscription is a benefit of membership.

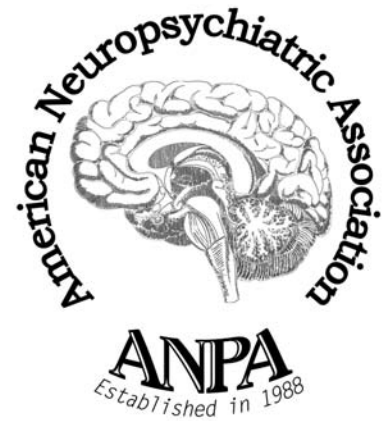

ANPA holds an annual scientific meeting and provides up to 29 CME credits. Members are encouraged to submit their work for presentation at our annual meetings. Travel awards are available for promising trainee clinicians and investigators. Annual meeting abstracts and proceedings are published in *JNCN*.

## Benefits of Membership

- Subscription to *The Journal of Neuropsychiatry and Clinical Neurosciences (JNCN)*
- Discounts on subscriptions to PsychiatryOnline.com including DSM Premium and DSM Premium Plus
- Opportunities for presenting at the annual meeting with accepted abstracts published in the *JNCN*
- Significantly reduced registration fees at the annual meeting
- Newsletters, news updates, information on job and training opportunities, research and meeting information on the ANPA web site: [www.anpaonline.org](http://www.anpaonline.org)
- Discounted membership and meeting registration fees for trainees
- Collaboration in clinical, educational and research activities with opportunities to interact with leaders in the field
- Complimentary video recordings of the annual meetings
- Access to educational slide sets assembled by the Education Committee
- Membership in Special Interest Groups (SIGs) designed to draw together ANPA members with similar clinical, research, and academic interests for the purposes of peer discussion, education, and potential collaboration

## Contact Information

**Join ANPA Now!**

Website: [www.anpaonline.org](http://www.anpaonline.org) • Email: [anpaoffice@gmail.com](mailto:anpaoffice@gmail.com)

**Don't miss ANPA's 27<sup>th</sup> Annual Meeting**

**San Diego, California • March 16-19, 2016**

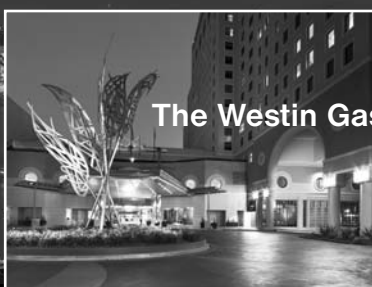

Join online at: [www.anpaonline.org](http://www.anpaonline.org)



27<sup>th</sup> Annual Meeting

# American Neuropsychiatric Association

The Westin Gaslamp Quarter

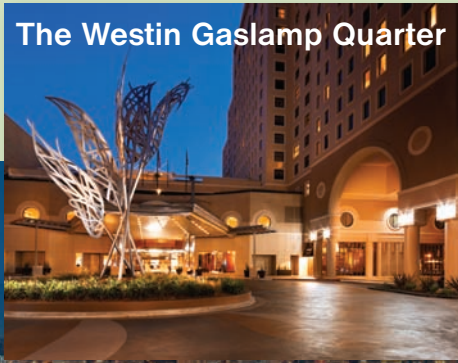

## San Diego, California March 16-19, 2016

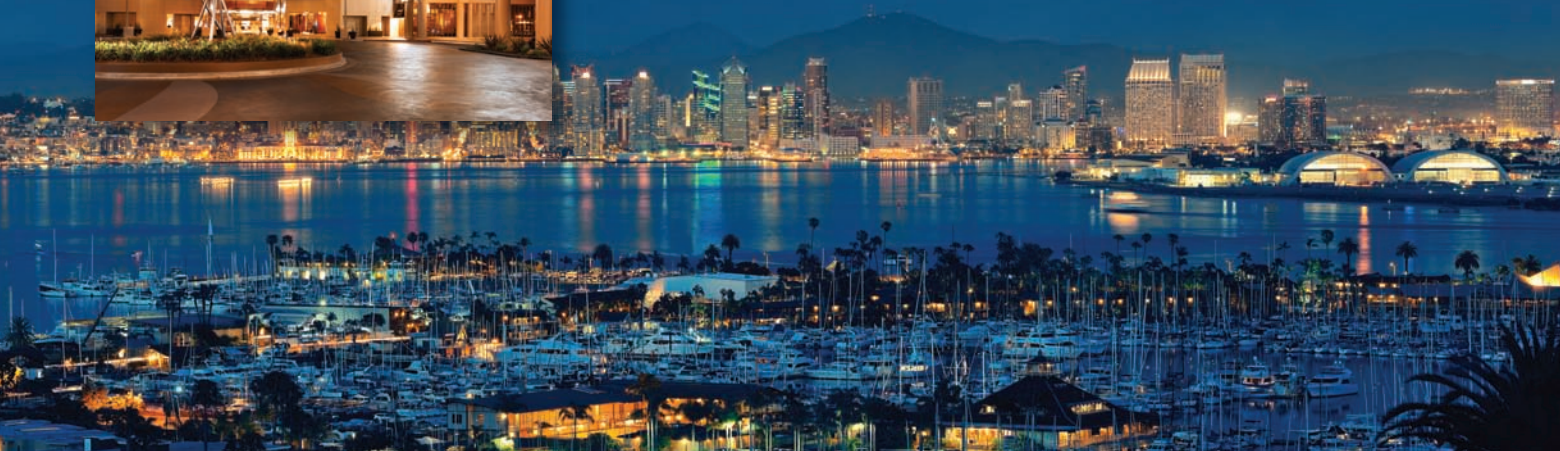

## Meeting Announcement &

You are invited to submit abstracts reporting new research or challenging clinical cases for poster or platform presentations. DEADLINE for receipt of abstracts is October 26, 2015.

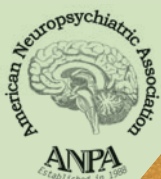

## Call for Abstracts

Abstracts presented at the meeting will be published online in the spring 2016 issue of *The Journal of Neuropsychiatry and Clinical Neurosciences*.

Prior to submitting abstracts, please refer to our website for information about ANPA's award programs, platform sessions, and poster session.

Complete submission instructions will be available July 10, 2015 at:

[www.anpaonline.org](http://www.anpaonline.org)

For more information contact the American Neuropsychiatric Association office at: [anpaoffice@gmail.com](mailto:anpaoffice@gmail.com)

SAN  
DIEGO



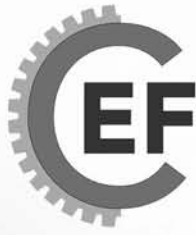

# Comprehensive Executive Function Inventory

Jack A. Naglieri, Ph.D. & Sam Goldstein, Ph.D.

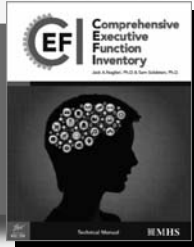

## Executive Function Scores You Can Trust!

**The most representative nationally normed behavior rating scale of executive function.**

The CEFI™ provides a comprehensive evaluation of executive function strengths and weaknesses in youth aged 5 to 18 years.

- **Accurate Results:** Normative samples are within 1% of U.S. Census targets for an accurate representation of the U.S. population.
- **Easy to Understand Reports:** Generate three types of dynamic reports including a Comparative Report by comparing results from multiple rater forms (Parent, Teacher, and Self).
- **Strategies for Intervention:** Utilize the CEFI's nine scales to pinpoint targets for intervention.
- **Save Time:** Assess, score, and report from anywhere with the safe and secure MHS Online Assessment Center.

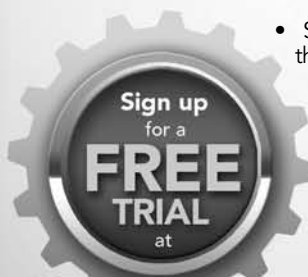

[MHS.com/CEFI](http://MHS.com/CEFI)

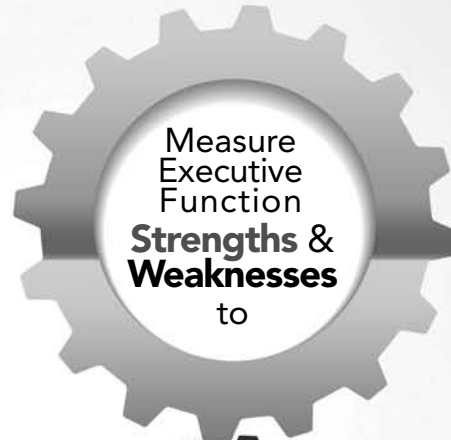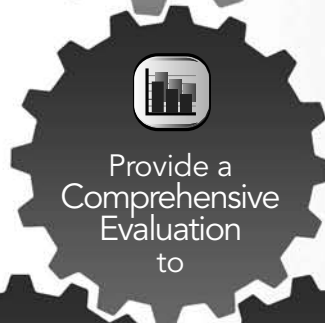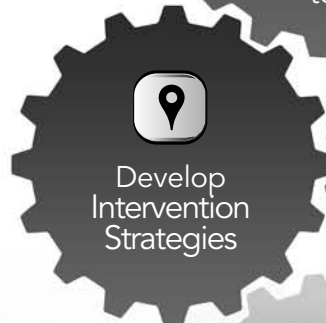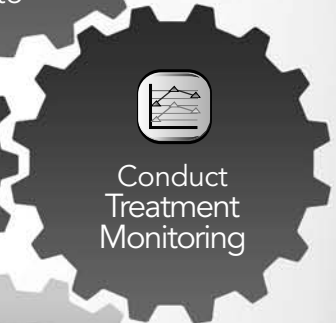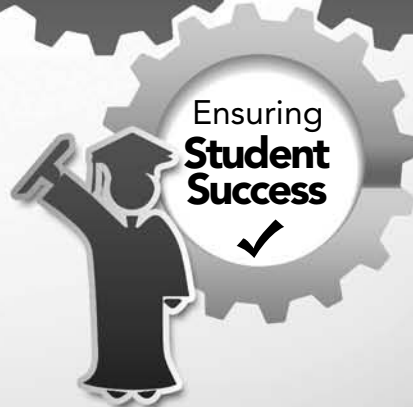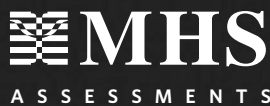

**Multi-Health Systems Inc.**

USA Tel: 1.800.456.3003 / CAN Tel: 1.800.268.6011  
mhs.com • customerservice@mhs.com

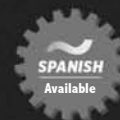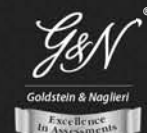

Source: https://psychiatryonline.org/doi/suppl/10.1176/jnp.2015.27.issue-2/suppl_file/back.pdf
