SPRING 2015 | VOLUME 27 | NUMBER 2

# The Journal of Neuropsychiatry

## and Clinical Neurosciences

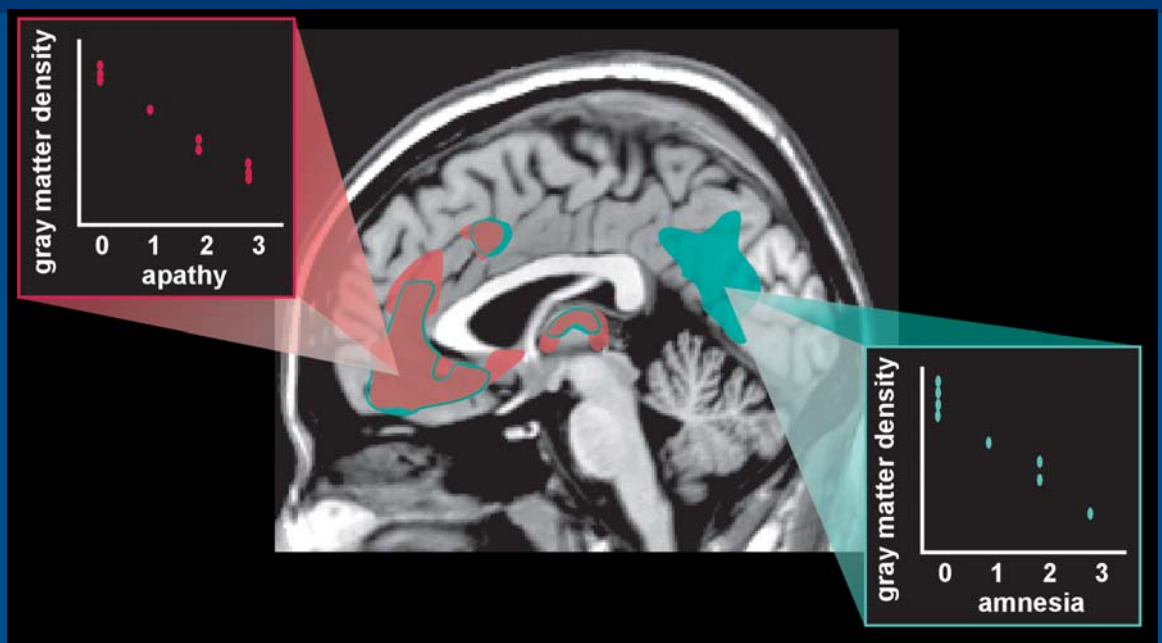

Neuroimaging and Neuropsychological Consequences of Cardiac Arrest

Psychiatric Disorders in Children and Adolescents  
24 Months After Mild Traumatic Brain Injury

Genes, Brains, and Behavior: Imaging Genetics  
for Neuropsychiatric Disorders

The Impact of Emotional Distress on Motor Blocks  
and Festination in Parkinson's Disease

Official Journal of the American Neuropsychiatric Association  
[neuro.psychiatryonline.org](http://neuro.psychiatryonline.org)
