# New Look and Features for *The Journal of Neuropsychiatry and Clinical Neurosciences!*

We have enhanced *The Journal of Neuropsychiatry and Clinical Neurosciences* with a bold new look and engaging features!

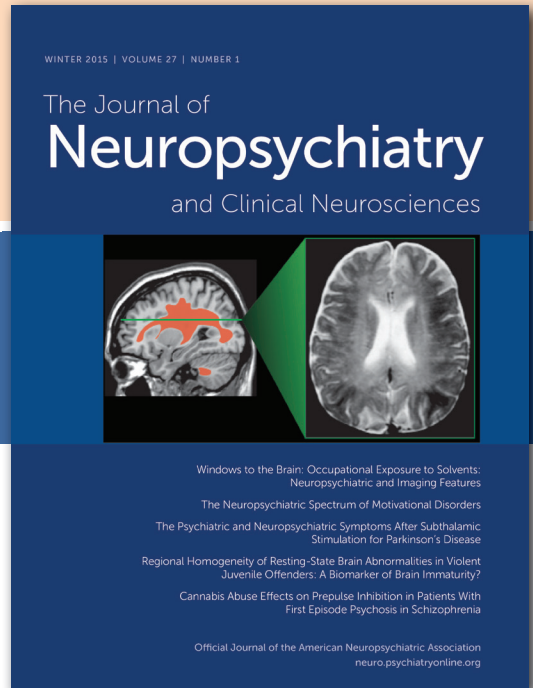

## The Journal of Neuropsychiatry and Clinical Neurosciences

Designed with the reader in mind, each issue will now have a more informative Table of Contents that provides a quick takeaway for each article to help you quickly determine items to turn to or mark for later reading.

In addition, symbols on the Table of Contents page and on the articles themselves will help you navigate to content that addresses the Core Competencies as defined by the Accreditation Council of Graduate Medical Education (ACGME) and the American Board of Medical Specialties (ABMS).

But one thing that won't change is that each issue will commence with the outstanding signature section "Windows to the Brain."

This improved reader experience continues at the journal's online portal. The journal homepage will push front and center the latest articles as soon as they are published so that cutting-edge research articles being featured in media stories are immediately discoverable.

We are excited to be bringing these enhancements to you as part of our continuing efforts to ensure we offer the most indispensable journal for professionals working at the interface between neuroscience and behavioral disorders.

### Core Competencies

-  Professionalism
-  Patient Care and Procedural Skills
-  Medical Knowledge
-  Practice-based Learning and Improvement
-  Interpersonal and Communication Skills
-  Systems-based Practice

[neuro.psychiatryonline.org](http://neuro.psychiatryonline.org)

American  
**Psychiatric**  
Publishing  
A Division of American Psychiatric Association

Web: [www.appi.org](http://www.appi.org)  
Phone: 1-800-368-5777  
Email: [appi@psych.org](mailto:appi@psych.org)

Priority Code AH1502

# The Journal of Neuropsychiatry and Clinical Neurosciences

Official Journal of the American Neuropsychiatric Association

## Editorial Board

The *Journal of Neuropsychiatry and Clinical Neurosciences* (ISSN 0895-0172), is published quarterly by the American Psychiatric Association (APA), 1000 Wilson Blvd., Suite 1825, Arlington, VA 22209. Copyright © 2015 American Psychiatric Association. The *Journal of Neuropsychiatry and Clinical Neurosciences*, is protected by copyright and may not be reproduced in any manner without written permission. The *Journal of Neuropsychiatry and Clinical Neurosciences* is abstracted/indexed in *Chemical Abstracts*, *Current Contents/Clinical Medicine*®, *EMBASE/Excerpta Medica*, *Index Medicus/MEDLINE/MEDLARS*, *PsycINFO*, *Psychological Abstracts*, *Research Alert*®, and *Sci Search*®. It is available through University Microfilms, Inc., 300 North Zeeb Road, Ann Arbor, MI 48106, in microform, electronic, or paper format.

Manuscript submissions should no longer be sent by mail. Please visit <http://mc.manuscriptcentral.com> to upload a paper online.

U.S. subscriptions are \$250 per year (4 issues) individual; \$200 for APA members; international subscriptions are \$377 per year; \$302 for international members. APA Members receive 20% discount off regular individual subscription rate. Institutional Subscriptions are tier priced.

For institutional site license information and pricing, please email us at [appi@psych.org](mailto:appi@psych.org), call (800) 368-5777 or visit [www.appi.org/ForLibrarians/](http://www.appi.org/ForLibrarians/). The *Journal of Neuropsychiatry and Clinical Neurosciences*, 1000 Wilson Blvd., Suite 1825, Arlington, VA 22209.

Advertising inquiries may be directed to Tim Wolfinger at PMI, 30 East 33rd St., New York, NY 10016; (212) 904-0379; [twolfinger@pminy.com](mailto:twolfinger@pminy.com).

APA is not responsible for statements made in this publication by contributors or advertisers. Unless stated, material in the *Journal of Neuropsychiatry and Clinical Neurosciences* does not reflect the endorsement, official attitude, or position of APA or the American Neuropsychiatric Association.

Periodicals postage paid at Arlington, VA, and additional mailing offices. POSTMASTER: Send address changes to the *Journal of Neuropsychiatry and Clinical Neurosciences*, 1000 Wilson Blvd., Suite 1825, Arlington, VA 22209.

### Editor

Stuart C. Yudofsky, M.D.

### Deputy Editors

C. Alan Anderson, M.D.  
David B. Arciniegas, M.D.  
Robert E. Hales, M.D., M.B.A.

### Assistant to the Editors

T. Angelita Garcia, M.B.A.

### Consulting Editors

C. Edward Coffey, M.D.  
Thomas W. McAllister, M.D.  
Henry Nasrallah, M.D.  
Fred Ovsiew, M.D.  
Jonathan M. Silver, M.D.

### Associate Editors

Sheldon Benjamin, M.D.  
Kevin J. Black, M.D.  
Nashaat N. Boutros, M.D.  
John J. Campbell, M.D.  
Miles Cunningham, M.D.  
Michael Ebert, M.D.  
Richard B. Ferrell, M.D.  
Laura A. Flashman, Ph.D.  
Yonas E. Geda, M.D.  
Daniel I. Kaufer, M.D.  
W. Curt LaFrance, M.D.  
Edward C. Lauterbach, M.D.  
Mario Mendez, M.D., Ph.D.  
Charles Nemeroff, M.D., Ph.D.  
Trevor R. P. Price, M.D.  
Robert G. Robinson, M.D.  
David A. Silbersweig, M.D.  
Robert Stern, Ph.D.  
Kaloyan S. Tanev, M.D.  
Hal S. Wortzel, M.D.

### Neuropsychiatry Classics Editor

Thomas C. Neylan, M.D.

### Book Review Editor

Paula T. Trzepacz, M.D.

### Windows to the Brain Editors

Robin A. Hurley, M.D.  
L. Anne Hayman, M.D.  
Katherine H. Taber, Ph.D.

### American Psychiatric Publishing

Rebecca D. Rinehart  
*Publisher*

Michael Roy  
*Editorial Director, Journals*

Angela Moore

*Editorial Manager*

Wendy Lieberman Taylor  
*Production Manager, Journals*

Y. Nicole Gray  
*Editorial Support Services Manager*

Patrick Hansard  
*Director of Marketing and Sales*

Christopher Keene  
*Sales Manager*

Roger Domras  
*Director of Fulfillment and Circulation*

Please visit the Journal's website at [neuro.psychiatryonline.org](http://neuro.psychiatryonline.org)

# There's So Much More to JNP Than Meets the Page!

Visit *The Journal of Neuropsychiatry and Clinical Neurosciences'* website on **PsychiatryOnline** for the following features!

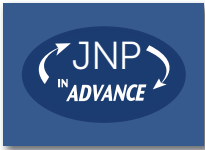

## JNP in Advance

The very latest research advances!

At JNP in Advance, you can discover the following before their appearance in print:

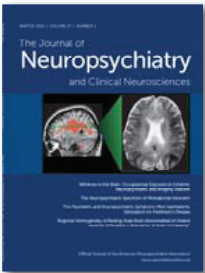

### Anxiety in Huntington's Disease

The authors conducted a systematic review of anxiety in Huntington's disease (HD). The prevalence of anxiety in manifest HD ranged from 13% to 71%. No significant difference in anxiety between manifest and premanifest HD carriers was revealed. Anxiety appears to be associated with depression, suicide, irritability, quality of life, pain, illness beliefs, and coping styles but does not seem to be linked with measures of disease progression.

### APOE $\epsilon$ 4 Genotype and the Risk for Subjective Cognitive Impairment in Elderly Persons

The authors compared the risk for subjective cognitive impairment (SCI) between carriers of the apolipoprotein E  $\epsilon$ 4 (APOE  $\epsilon$ 4) allele (cases) and APOE  $\epsilon$ 4 noncarriers (controls). SCI was assessed by a validated self-reported questionnaire. The risk for SCI was significantly higher among cases than controls, particularly for those 70 years of age and older.

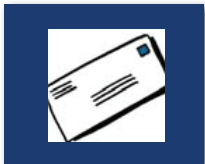

## Letters to the Editor

Full text of all letters appears online with each issue. Accompanying this month's issue include:

- Poststroke Subcortical Aphasia and Neurobehavioral Disturbances Without Motor or Sensory Deficits
- Enhanced Olfactory Cortex Connectivity in a Patient With PTSD With Olfactory Hallucinations
- Unusual Case of Sporadic Creutzfeldt–Jakob Disease Subtype VV1
- Differentiating Frontotemporal Dementia From Catatonia: A Complex Neuropsychiatric Challenge

View all letters at <http://neuro.psychiatryonline.org>

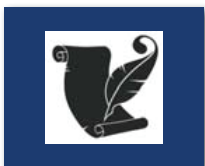

## Revisit the field's rich history!

25 years ago this month:

### A Brief Scale for the Dementia of Parkinson's Disease

Parkinson's disease resulted in inconsistencies and controversies in the literature regarding the incidence and basis of this condition. The authors examined a large group of patients with Parkinson's disease using two standardized sets of criteria for dementia. The neuropsychological data obtained were analyzed using stepwise discriminant analysis, and a brief scale was developed. The results indicated that a regression equation derived from just three neuropsychological procedures (which take only 10 minutes to administer) provided maximum discrimination between patients originally classified as demented or nondemented according to standardized criteria.

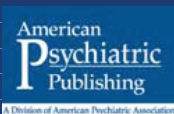

**neuro.psychiatryonline.org**

[www.appi.org](http://www.appi.org) • 1-800-368-5777 • Fax: 703-907-1091 • Email: [appi@psych.org](mailto:appi@psych.org)

Priority Code AH1510
